# Supplementary material
Source: PubMed Central journal article supplement (PMC6682360)

# Supplementary Figure 1

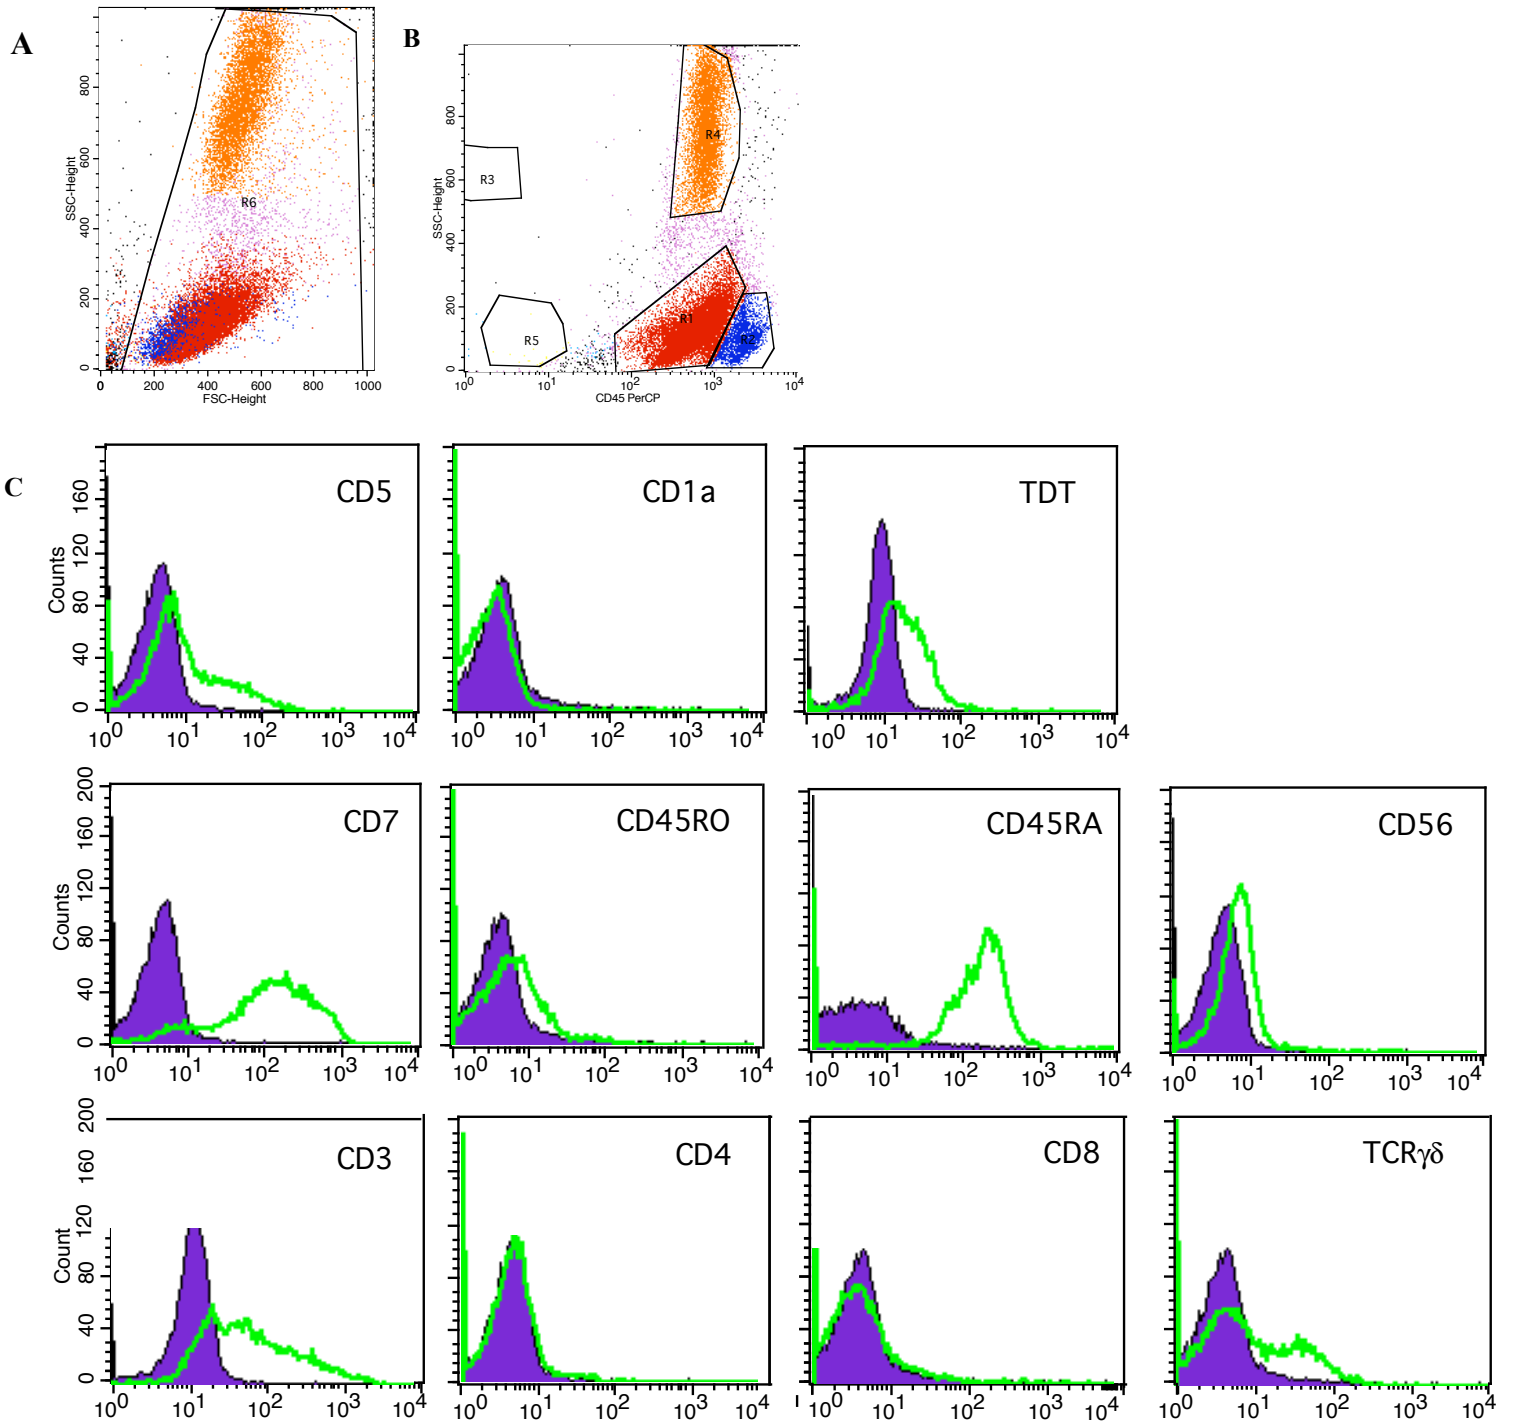

**Supplementary Figure 1**

**C**

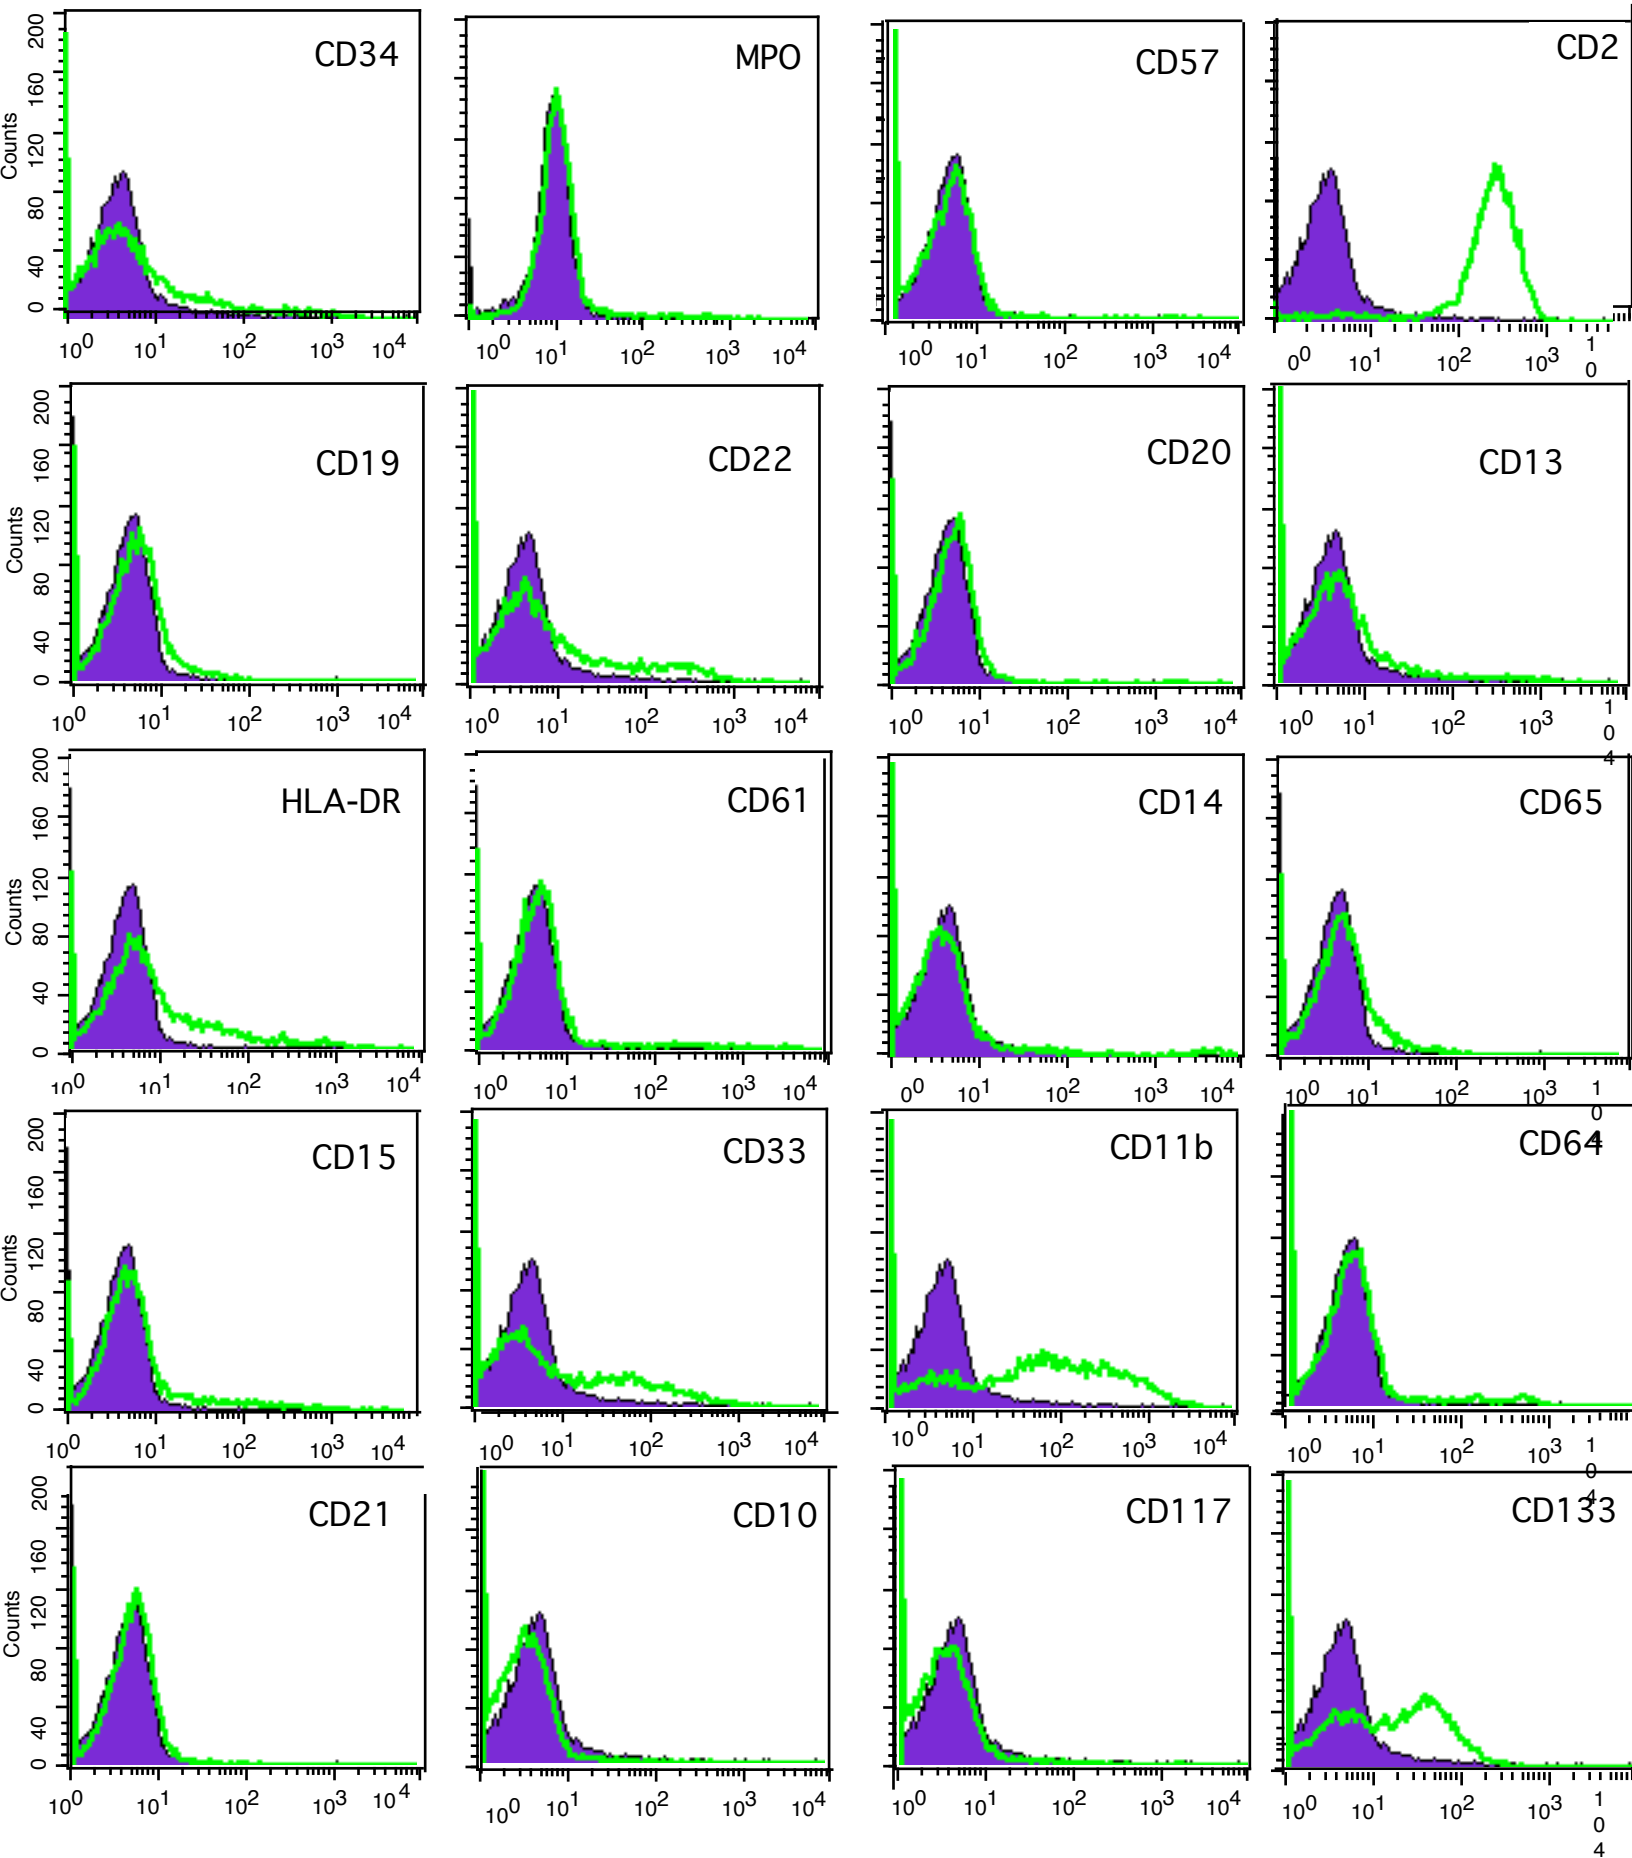

Supplement: koni-08-08-1599637-s001.pdf [file koni-08-08-1599637-s001.pdf]
